# Supplementary material for: Transcriptome Analysis of the Arabidopsis Megaspore Mother Cell Uncovers the Importance of RNA Helicases for Plant Germline Development
Source: PLoS Biol. 2011 Sep 20;9(9):e1001155. doi: 10.1371/journal.pbio.1001155 (PMC3176755; doi:10.1371/journal.pbio.1001155)
Supplement: Table S7 — Analysis of enriched gene expression in the MMC as compared to the tissue atlas. Mean expression levels calculated by dChip [81] for all genes identified to be significantly higher expressed in the MMC as compared to the tissue atlas not including the sporo_nucellus available as additional datasheet. Expression levels in all samples composing the tissue atlas (including sporo_nucellus) are given. (XLS) [file pbio.1001155.s017.xls]

## Sheet: MMC_limmaBH-0.01_withoutWR.xls
id	AGI	Gene Model Description	Primary Gene Symbol	young_leaf	pollen_Schmid	root_atrichoblast	mature_leaf	silique_glob_emb	seedling	petiole	silique_heart_emb	sperm	cotyledon	silique_triang_emb	synergid_cell	whole_plant	seed_torpedo	pollen_Borges	senescent_leaf	shoot	late_ovules	cauline_leaf	seed_walk_stick	early_ovules	internode_shoot	seed_early_curl_cot	glob_embryo_apical	flower_st6	seed_early_green_cot	globular_embryo_basal	hypocotyl	seed_green_cot1	flower_st9	early_rosette	heart_embryo_cot	flower_st11	inflor_shoot	heart_embryo_root	flower_st12	root_d17	sepal	central_cell	petal	egg_cell	Meristem_Clavata3_1	stamen	root_endodermis	Meristem_Fil	root_stele
AT1G03290_at	AT1G03290	unknown protein; FUNCTIONS IN: molecular_function unknown; INVOLVED IN: biological_process unknown; LOCATED IN: cellular_component unknown; EXPRESSED IN: 22 plant structures; EXPRESSED DURING: 13 growth stages; BEST Arabidopsis thaliana protein match is: unknown protein (TAIR:AT4G02880.1); Has 10945 Blast hits to 7852 proteins in 686 species: Archae - 147; Bacteria - 1290; Metazoa - 5004; Fungi -…	NA	169.898	207.087	191.94	536.835	381.984	449.468	288.056	430.587	64.1477	408.549	382.226	216.81	400.052	248.531	486.598	1266.64	166.373	488.169	757.106	270.731	550.24	538.782	214.482	89.3499	303.435	179.32	95.4639	217.849	159.76	427.572	106.079	129.753	469.192	247.451	113.239	412.196	301.892	565.629	433.667	311.078	494.498	649.971	686.651	295.673	555.533	157.405
AT1G05290_at	AT1G05290	transcription factor; FUNCTIONS IN: transcription factor activity; INVOLVED IN: regulation of transcription; EXPRESSED IN: sperm cell, flower; EXPRESSED DURING: 4 anthesis; CONTAINS InterPro DOMAIN/s: CCT domain (InterPro:IPR010402); BEST Arabidopsis thaliana protein match is: zinc finger (B-box type) family protein (TAIR:AT3G21880.1); Has 837 Blast hits to 829 proteins in 61 species: Archae - 0;…	NA	15.9442	79.3511	149.084	15.8656	27.2533	33.8594	12.21	37.8924	262.099	17.9497	33.6881	195.711	15.9239	52.8291	194.488	19.0052	20.6045	19.4861	20.1922	45.6595	16.4074	22.2978	53.3674	111.235	25.4793	47.1337	169.866	14.9981	36.7069	29.2538	18.0732	136.334	42.1431	28.5938	160.616	44.9848	36.6473	27.9348	23.3984	39.3013	30.7855	111.142	162.527	112.851	45.1651	156.434
AT1G05430_at	AT1G05430	unknown protein; FUNCTIONS IN: molecular_function unknown; INVOLVED IN: biological_process unknown; LOCATED IN: cellular_component unknown; EXPRESSED IN: 23 plant structures; EXPRESSED DURING: 13 growth stages; Has 19 Blast hits to 19 proteins in 5 species: Archae - 0; Bacteria - 0; Metazoa - 0; Fungi - 0; Plants - 19; Viruses - 0; Other Eukaryotes - 0 (source: NCBI BLink).	NA	591.07	258.35	321.018	505.122	478.085	315.127	487.805	436.661	479.56	533.846	420.721	467.254	452.009	402.69	166.535	420.735	412.851	562.894	431.46	422.908	472.758	416.472	384.615	311.334	540.069	367.116	337.425	413.127	372.402	539.964	506.391	408.192	490.371	608.913	419.971	489.053	387.155	506.518	423.772	488.991	668.923	481.583	373.182	414.834	513.533	363.841
AT1G11270_at	AT1G11270	F-box family protein; FUNCTIONS IN: molecular_function unknown; INVOLVED IN: heat acclimation; EXPRESSED IN: embryo, pedicel; EXPRESSED DURING: 4 anthesis, D bilateral stage, E expanded cotyledon stage; CONTAINS InterPro DOMAIN/s: Cyclin-like F-box (InterPro:IPR001810), F-box associated (InterPro:IPR006527); BEST Arabidopsis thaliana protein match is: S locus F-box-related / SLF-related (TAIR:AT2…	NA	164.038	361.529	204.048	212.515	147.569	163.836	151.062	152.337	305.733	179.404	168.009	341.102	161.407	202.893	337.615	170.931	121.896	189.747	176.487	189.652	194.407	162.864	261.088	195.31	188.422	249.752	228.413	156.665	283.851	178.941	147.161	272.043	166.259	164.776	180.382	160.422	205.097	164.429	235.327	190.843	187.32	311.292	202.752	196.594	222.735	174.46
AT1G14570_at	AT1G14570	UBX domain-containing protein; FUNCTIONS IN: molecular_function unknown; INVOLVED IN: biological_process unknown; LOCATED IN: cellular_component unknown; EXPRESSED IN: 24 plant structures; EXPRESSED DURING: 15 growth stages; CONTAINS InterPro DOMAIN/s: UAS (InterPro:IPR006577), Uncharacterised conserved protein UCP037991, UAS, UBX (InterPro:IPR017346), UBX (InterPro:IPR001012), Ubiquitin interact…	NA	822.461	601.816	916.468	947.034	1154.9	754.005	1046.34	1209.74	414.699	817.579	1215.27	1222.23	967.971	1267.98	710.398	1780.81	944.639	1829.14	1165.75	1311.7	1774.79	1287.58	1299.22	511.62	1492.32	1455.47	529.054	1136.88	1373.41	1237.85	989.119	952.315	1366.41	1216.22	809.683	1330.62	1240.65	1022.07	963.527	1942.05	1927.99	1703.87	1294.49	1345.87	1470.67	1110.43
AT1G14750_at	AT1G14750	Encodes a meiotic cyclin-like protein, distinct from all other known Arabidopsis cyclins. It is not required for meiotic DSB formation but is necessary for meiotic DSB repair via the homologous chromosome.	SOLO DANCERS (SDS)	72.8801	101.607	104.284	73.9456	64.5699	70.1639	76.7021	62.3122	140.234	80.9697	55.8863	169.65	80.1094	53.448	88.845	61.8475	70.4171	76.4117	65.3003	42.1445	108.642	75.1783	41.7799	284.107	98.3711	54.083	358.516	84.8994	51.3609	121.109	66.246	235.171	76.1381	114.949	221.85	68.072	84.0361	57.4616	115.745	62.7317	218.451	147.634	62.5712	130.341	133.31	132.649
AT1G15710_at	AT1G15710	prephenate dehydrogenase family protein; FUNCTIONS IN: binding, prephenate dehydrogenase (NADP+) activity, catalytic activity; INVOLVED IN: tyrosine biosynthetic process, metabolic process; LOCATED IN: chloroplast; EXPRESSED IN: 24 plant structures; EXPRESSED DURING: 13 growth stages; CONTAINS InterPro DOMAIN/s: Prephenate dehydrogenase (InterPro:IPR003099), NAD(P)-binding (InterPro:IPR016040), A…	NA	568.208	527.632	281.21	285.869	498.199	408.776	430.711	565.682	159.623	456.26	566.075	139.924	397.705	714.257	487.412	190.684	794.498	384.493	224.793	678.874	386.268	296.894	616.382	196.61	500.444	545.332	210.035	478.199	584.322	473.893	605.313	217.118	449.09	534.161	266.035	456.15	324.195	338.19	179.55	351.253	193.719	463.706	387.267	276.536	461.372	290.06
AT1G22090_at	AT1G22090	embryo defective 2204 (emb2204); FUNCTIONS IN: molecular_function unknown; INVOLVED IN: embryonic development ending in seed dormancy; LOCATED IN: cellular_component unknown; CONTAINS InterPro DOMAIN/s: Protein of unknown function DUF626, Arabidopsis thaliana (InterPro:IPR006462); BEST Arabidopsis thaliana protein match is: unknown protein (TAIR:AT1G02770.1); Has 74 Blast hits to 73 proteins in 1…	EMBRYO DEFECTIVE 2204 (emb2204)	45.9898	141.653	43.015	44.9967	51.6259	40.7262	46.1371	59.242	325.2	47.5331	44.272	223.945	39.9651	35.7438	233.749	49.9291	44.7556	101.923	46.6545	40.7288	86.0371	49.5056	45.9362	212.372	45.7963	43.0708	251.78	44.2327	51.3231	117.55	42.6172	302.84	97.68	44.0307	186.489	50.3879	44.1406	47.7427	970.19	42.7726	593.444	63.1665	86.5027	50.3645	60.4287	40.9978
AT1G23410_at	AT1G23410	ubiquitin extension protein, putative / 40S ribosomal protein S27A (RPS27aA); FUNCTIONS IN: protein binding, structural constituent of ribosome; INVOLVED IN: protein ubiquitination during ubiquitin-dependent protein catabolic process, protein modification process, translation; LOCATED IN: cytosolic small ribosomal subunit, plasma membrane; EXPRESSED IN: 21 plant structures; EXPRESSED DURING: 11 g…	NA	664.859	304.214	1649.69	142.966	352.883	258.741	231.625	500.5	217.74	176.278	362.959	847.349	291.298	306.302	293.157	157.305	558.019	941.582	130.643	259.723	857.848	164.782	226.058	1103.38	1108.05	268.675	619.174	366.575	222.636	607.482	489.656	616.044	483.297	859.15	413.894	366.579	1220.67	192.848	1390.79	292.409	927.115	762.835	312.609	991.669	1273.08	1499.47
AT1G26470_at	AT1G26470	FUNCTIONS IN: molecular_function unknown; INVOLVED IN: regulation of transcription; LOCATED IN: nucleus, H4/H2A histone acetyltransferase complex; EXPRESSED IN: 23 plant structures; EXPRESSED DURING: 15 growth stages; CONTAINS InterPro DOMAIN/s: CT20 (InterPro:IPR012423); Has 39 Blast hits to 39 proteins in 17 species: Archae - 0; Bacteria - 0; Metazoa - 24; Fungi - 0; Plants - 15; Viruses - 0; O…	NA	663.991	451.218	1415.53	416.374	680.754	227.187	619.534	649.098	163.707	353.012	732.6	889.581	564.994	888.253	273.759	390.822	593.474	1219.23	383.055	788.717	914.079	416.864	881.639	761.615	885.213	749.757	705.555	767.195	794.747	860.852	658.732	607.38	823.936	1063.08	445.083	726.864	971.226	545.071	1575.24	550.09	1595.58	623.728	492.329	659.215	373.676	1220.74
AT1G29440_at	AT1G29440	FUNCTIONS IN: molecular_function unknown; INVOLVED IN: response to auxin stimulus; EXPRESSED IN: 19 plant structures; EXPRESSED DURING: 10 growth stages; CONTAINS InterPro DOMAIN/s: Auxin responsive SAUR protein (InterPro:IPR003676); BEST Arabidopsis thaliana protein match is: SAUR68 (SMALL AUXIN UPREGULATED 68) (TAIR:AT1G29510.1); Has 327 Blast hits to 317 proteins in 15 species: Archae - 0; Bac…	NA	154.018	19.0525	24.3752	141.746	183.795	220.435	109.441	173.262	25.3322	81.1577	139.928	33.3509	100.888	12.8674	55.1114	14.9735	84.5469	20.0292	93.5658	11.7665	23.6778	115.74	11.0857	39.5548	22.7043	13.5828	47.6612	48.0625	13.7492	41.6014	186.325	41.9423	64.5562	22.4529	54.1179	83.6293	14.5545	54.8476	43.7989	45.5112	51.333	14.8498	22.0488	18.877	19.3196	22.6506
AT1G35470_at	AT1G35470	SPla/RYanodine receptor (SPRY) domain-containing protein; FUNCTIONS IN: molecular_function unknown; INVOLVED IN: biological_process unknown; LOCATED IN: cellular_component unknown; EXPRESSED IN: 23 plant structures; EXPRESSED DURING: 13 growth stages; CONTAINS InterPro DOMAIN/s: B302 (SPRY)-like (InterPro:IPR001870), CTLH, C-terminal to LisH motif (InterPro:IPR006595), LisH dimerisation motif (In…	NA	405.619	102.234	195.864	314.497	315.569	624.643	395.391	326.418	362.921	398.732	325.37	218.366	363.297	348.383	152.833	408.422	361.134	397.436	343.311	323.288	407.174	338.653	423.811	159.48	268.114	413.027	194.588	247.004	421.389	376.629	465.334	239.932	330.461	280.552	182.277	277.431	228.599	324.35	588.387	281.443	539.491	469.426	186.292	205.116	271.268	159.292
AT1G53650_at	AT1G53650	RNA-binding protein, putative, similar to RNA-binding protein GB:AAA86641 GI:1174153 from (Arabidopsis thaliana).Contains PAB2 domain which facilitates binding to PABC proteins.	CTC-INTERACTING DOMAIN 8 (CID8)	214.078	333.027	185.175	234.356	265.702	251.519	247.28	272.371	119.914	240.123	277.117	205.098	199.394	264.188	498.966	236.197	191.9	335.531	195.66	241.641	273.302	252.923	187.273	309.454	228.791	135.168	301.357	273.273	177.365	227.544	182.82	1105.55	293.789	275.322	886.507	297.322	226.643	246.466	418.813	233.421	260.51	343.516	500.469	196.205	248.216	168.62
AT1G60180_at	AT1G60180	pseudogene of F-box family protein	NA	68.4457	93.9893	80.0078	71.8862	57.4406	31.7773	63.558	42.0139	115.763	66.0517	50.333	118.52	67.7406	52.2575	85.2157	62.6519	40.1474	56.491	67.3645	51.9653	46.6771	55.3703	49.6644	193.009	53.0921	66.5017	224.15	67.8357	56.8926	46.6513	42.527	177.267	45.6398	53.8704	178.579	48.8991	45.8807	58.3552	105.3	64.2157	123.938	50.8343	56.0342	115.533	43.1886	91.8904
AT1G61990_at	AT1G61990	mitochondrial transcription termination factor-related / mTERF-related; FUNCTIONS IN: molecular_function unknown; INVOLVED IN: biological_process unknown; EXPRESSED IN: 22 plant structures; EXPRESSED DURING: 13 growth stages; CONTAINS InterPro DOMAIN/s: Mitochodrial transcription termination factor-related (InterPro:IPR003690); BEST Arabidopsis thaliana protein match is: mitochondrial transcripti…	NA	272.492	295.535	279.578	187.466	220.451	372.24	172.139	271.913	202.594	156.18	255.822	279.016	185.923	296.914	178.982	243.91	319.793	317.548	185.519	261.798	270.948	148.783	490.106	420.315	492.544	437.589	261.999	236.326	516.84	372.669	292.167	642.795	328.578	466.023	380.104	275.866	231.864	180.197	488.47	229.152	507.845	419.053	151.182	191.514	438.992	266.331
AT1G68420_at	AT1G68420	asparaginyl-tRNA synthetase-related; FUNCTIONS IN: nucleotide binding, aminoacyl-tRNA ligase activity, ATP binding; INVOLVED IN: translation, tRNA aminoacylation for protein translation; LOCATED IN: cytoplasm; CONTAINS InterPro DOMAIN/s: Aminoacyl-tRNA synthetase, class II (D, K and N) (InterPro:IPR004364), Aminoacyl-tRNA synthetase, class II (D, K and N)-like (InterPro:IPR018150); BEST Arabidops…	NA	21.0639	36.6785	29.8553	23.5797	15.2447	25.2909	22.1212	21.6256	90.2118	21.3611	22.4016	83.6061	17.1614	25.0891	60.0804	24.255	18.3462	19.1447	22.1578	24.8509	27.0145	20.6515	34.1139	71.7137	19.8877	37.5209	83.7977	18.8685	30.2101	17.8292	15.2514	120.439	17.1826	21.7794	56.4178	20.9178	20.8461	19.2782	105.552	22.9062	91.5587	33.4619	23.9477	34.0867	26.7884	21.8339
AT1G72320_at	AT1G72320	Encodes a member of the Arabidopsis Pumilio (APUM) proteins containing PUF domain (eight repeats of approximately 36 amino acids each). PUF proteins regulate both mRNA stability and translation through sequence-specific binding to the 3' UTR of target mRNA transcripts.	ARABIDOPSIS PUMILIO 23 (APUM23)	297.754	408.454	335.283	190.621	217.967	302.879	204.867	228.587	206.926	165.551	242.961	261.322	238.948	270.717	393.711	289.416	415.874	385.535	255.625	269.355	488.502	196.331	250.194	350.653	464.211	292.431	326.586	279.535	299.097	364.809	307.654	556.747	354.537	470.202	375.041	324.001	273.162	242.849	494.902	249.704	653.316	422.353	191.935	228.502	431.232	351.984
AT1G72730_at	AT1G72730	eukaryotic translation initiation factor 4A, putative / eIF-4A, putative; FUNCTIONS IN: helicase activity, nucleic acid binding, ATP-dependent helicase activity, ATP binding; INVOLVED IN: biological_process unknown; LOCATED IN: cytosol, plasma membrane, plant-type cell wall; EXPRESSED IN: 23 plant structures; EXPRESSED DURING: 11 growth stages; CONTAINS InterPro DOMAIN/s: RNA helicase, DEAD-box t…	NA	285.746	310.628	1013.61	87.8348	342.714	218.223	208.053	385.318	1314.23	95.5827	346.44	665.991	193.459	454.069	396.994	89.0475	337.571	224.425	86.249	330.344	393.693	178.726	129.38	698.154	674.097	112.586	869.176	328.604	105.663	476.72	282.311	538.635	406.904	617.463	572.121	352.212	741.965	160.672	809.826	308.42	622.458	1181.27	576.149	727.935	1093.37	950.272
AT1G73700_at	AT1G73700	MATE efflux family protein; FUNCTIONS IN: drug transporter activity, antiporter activity, transporter activity; INVOLVED IN: multidrug transport; LOCATED IN: membrane; EXPRESSED IN: 8 plant structures; EXPRESSED DURING: 4 anthesis, petal differentiation and expansion stage; CONTAINS InterPro DOMAIN/s: MATE family transporter related protein (InterPro:IPR015521), Multi antimicrobial extrusion prot…	NA	47.3468	221.344	45.4508	65.6721	53.2763	103.539	34.0181	80.8297	138.85	46.9509	64.6425	178.695	43.2095	45.4661	384.664	170.435	38.7868	83.022	125.239	46.289	68.4816	52.7747	45.6032	250.574	57.9559	54.5359	192.39	35.2828	48.9763	65.3831	53.9473	188.693	94.2497	39.0093	202.773	73.9488	31.2105	53.7266	563.642	52.8919	455.819	44.0985	284.781	58.2311	49.5388	49.628
AT1G77570_at	AT1G77570	DNA binding / transcription factor; FUNCTIONS IN: transcription factor activity, DNA binding; INVOLVED IN: regulation of transcription, DNA-dependent; LOCATED IN: endomembrane system, nucleus; EXPRESSED IN: 13 plant structures; EXPRESSED DURING: 6 growth stages; CONTAINS InterPro DOMAIN/s: Winged helix repressor DNA-binding (InterPro:IPR011991), Heat shock factor (HSF)-type, DNA-binding (InterPro…	NA	88.4669	82.7244	84.0428	86.5365	75.4957	55.9402	71.8968	89.9768	59.991	96.8629	93.8893	76.8504	78.7831	93.8831	38.6893	125.176	68.8078	177.669	95.4811	100.912	173.302	66.419	144.311	161.434	114.569	174.425	126.255	64.8111	196.232	135.081	74.5621	173.734	102.847	101.594	221.971	83.3016	58.7161	92.4961	108.972	68.1198	197.684	111.115	70.8331	95.6625	140.149	113.643
AT1G78160_at	AT1G78160	Encodes a member of the Arabidopsis Pumilio (APUM) proteins containing PUF domain (eight repeats of approximately 36 amino acids each). PUF proteins regulate both mRNA stability and translation through sequence-specific binding to the 3' UTR of target mRNA transcripts.	ARABIDOPSIS PUMILIO 7 (APUM7)	112.279	400.624	153.189	91.8041	97.6642	70.6704	87.8473	73.4433	138.844	100.032	69.1556	350.835	90.2992	92.8489	256.148	92.2237	64.0152	79.5305	85.7272	103.161	77.9136	81.6589	109.057	460.908	59.9944	116.583	436.936	72.529	120.982	67.965	77.7844	358.176	85.5278	64.3646	348.892	122.319	85.4111	83.5953	221.525	89.7042	362.141	66.063	557.734	187.171	54.7401	175.548
AT1G78750_at	AT1G78750	F-box family protein; FUNCTIONS IN: molecular_function unknown; INVOLVED IN: biological_process unknown; LOCATED IN: cellular_component unknown; EXPRESSED IN: sperm cell, inflorescence meristem, leaf; EXPRESSED DURING: LP.06 six leaves visible, LP.04 four leaves visible; CONTAINS InterPro DOMAIN/s: Cyclin-like F-box (InterPro:IPR001810), FBD (InterPro:IPR013596), FBD-like (InterPro:IPR006566), Le…	NA	72.7008	139.82	81.6242	102.791	65.5138	97.1207	95.5282	58.7772	247.845	90.9785	60.85	118.294	72.6981	52.7107	226.513	80.5676	72.0607	52.9195	69.1339	54.5711	48.2429	111.641	60.9934	190.213	47.8904	81.0493	186.8	84.2662	76.7172	44.5578	59.8535	169.814	57.8168	49.1597	189.784	56.9936	56.7561	57.6486	140.9	63.0437	144.546	41.8605	72.3985	79.5056	38.2409	62.7526
AT1G79150_at	AT1G79150	binding; FUNCTIONS IN: binding; INVOLVED IN: biological_process unknown; LOCATED IN: cellular_component unknown; EXPRESSED IN: 23 plant structures; EXPRESSED DURING: 13 growth stages; CONTAINS InterPro DOMAIN/s: CCAAT-binding factor (InterPro:IPR005612), Armadillo-type fold (InterPro:IPR016024), Nucleolar complex-associated (InterPro:IPR011501); Has 2887 Blast hits to 2283 proteins in 254 species…	NA	323.35	150.929	368.211	109.16	175.126	564.388	239.063	182.578	788.114	124.237	158.472	346.316	233.047	219.535	240.37	170.189	568.127	487.773	135.713	266.324	348.627	133.463	216.368	261.21	569.508	254.384	364.842	285.79	290.695	400.216	237.393	365.254	305.348	534.989	290.931	327.806	344.908	245.814	465.989	256.485	973.891	506.315	142.253	292.669	526.908	373.002
AT2G05160_at	AT2G05160	zinc finger (CCCH-type) family protein / RNA recognition motif (RRM)-containing protein; FUNCTIONS IN: RNA binding, nucleotide binding, zinc ion binding, nucleic acid binding; INVOLVED IN: biological_process unknown; LOCATED IN: cellular_component unknown; EXPRESSED IN: 6 plant structures; EXPRESSED DURING: 4 anthesis, petal differentiation and expansion stage; CONTAINS InterPro DOMAIN/s: Zinc fi…	NA	156.921	444.293	54.8185	47.3586	116.928	103.902	53.2697	51.0493	330.666	79.5875	52.562	94.185	101.42	72.6773	518.32	31.1204	186.111	29.136	85.3375	54.0755	39.3495	43.1657	58.2907	137.976	34.3165	37.7226	96.0674	49.8721	37.9666	85.7497	153.123	79.0206	213.606	33.5287	83.575	150.583	76.5969	96.6526	83.8962	34.3857	164.562	29.8781	568.248	35.4444	35.4992	54.2438
AT2G11810_at	AT2G11810	MGD3 is the major enzyme for galactolipid metabolism during phosphate starvation. Does not contribute to galactolipid synthesis under P1-sufficient conditions.	MONOGALACTOSYLDIACYLGLYCEROL SYNTHASE TYPE C (MGDC)	148.149	432.942	84.7652	236.357	178.108	246.44	130.625	267.51	232.895	198.224	164.053	269.355	172.082	121.271	372.135	556.578	153.502	109.016	215.335	118.089	101.662	280.153	120.203	414.046	107.293	141.15	435.447	114.156	120.096	104.219	192.818	453.397	132.061	95.4653	374.327	130.257	160.179	156.995	177.002	116.242	135.022	74.2444	168.731	125.296	99.9584	124.997
AT2G20390_at	AT2G20390	unknown protein; FUNCTIONS IN: molecular_function unknown; INVOLVED IN: biological_process unknown; LOCATED IN: cellular_component unknown; EXPRESSED IN: 22 plant structures; EXPRESSED DURING: 13 growth stages; Has 27 Blast hits to 27 proteins in 10 species: Archae - 0; Bacteria - 2; Metazoa - 0; Fungi - 0; Plants - 25; Viruses - 0; Other Eukaryotes - 0 (source: NCBI BLink).	NA	980.338	485.52	778.548	514.587	527.341	370.607	663.651	557.524	379.183	672.542	451.325	542.498	688.743	365.74	386.243	340.938	787.596	514.734	432.098	365.141	667.107	437.596	342.725	900.667	622.797	337.39	947.064	664.966	383.309	614.945	691.8	779.035	599.902	709.716	678.173	633.531	550.644	618.825	592.393	596.951	561.053	413.205	488.696	562.121	443.575	585.924
AT2G30940_at	AT2G30940	protein kinase family protein; FUNCTIONS IN: protein tyrosine kinase activity, protein kinase activity, kinase activity, ATP binding; INVOLVED IN: protein amino acid phosphorylation; EXPRESSED IN: flower, cultured cell; EXPRESSED DURING: 4 anthesis; CONTAINS InterPro DOMAIN/s: Protein kinase, core (InterPro:IPR000719), Tyrosine protein kinase (InterPro:IPR001245), Protein kinase-like (InterPro:IP…	NA	112.575	250.285	122.881	103.822	102.981	79.994	107.843	93.5541	196.777	113.342	85.9346	321.089	118.362	87.5435	244.509	79.0395	106.655	68.0554	108.438	90.0165	78.7464	83.6879	102.061	387.515	91.7746	125.166	344.208	102.101	131.932	73.0276	97.0453	400.404	89.4036	91.7825	352.717	99.8107	97.7476	99.0745	254.753	104.141	304.84	121.141	139.032	178.578	90.8031	151.582
AT2G39240_at	AT2G39240	RNA polymerase I transcription factor/ binding; FUNCTIONS IN: RNA polymerase I transcription factor activity, binding; CONTAINS InterPro DOMAIN/s: RNA polymerase I specific transcription initiation factor RRN3 (InterPro:IPR007991), Armadillo-type fold (InterPro:IPR016024); BEST Arabidopsis thaliana protein match is: RNA polymerase I specific transcription initiation factor RRN3 family protein (TA…	NA	136.274	349.982	144.248	113.907	105.993	64.1771	97.5284	93.1006	164.572	135.017	96.9191	281.606	113.306	120.898	213.322	102.081	136.582	62.1026	105.615	139.846	57.7477	100.697	146.128	268.06	103.454	230.802	266.908	92.0215	171.11	97.3302	134.881	253.571	105.493	79.3572	247.974	106.422	72.661	102.636	215.225	98.6426	257.516	79.5938	136.424	127.789	74.0581	139.325
AT2G39820_at	AT2G39820	eukaryotic translation initiation factor 6, putative / eIF-6, putative; FUNCTIONS IN: ribosome binding, translation initiation factor activity; INVOLVED IN: translational initiation, mature ribosome assembly; LOCATED IN: cellular_component unknown; EXPRESSED IN: 7 plant structures; EXPRESSED DURING: L mature pollen stage, M germinated pollen stage, 4 anthesis, petal differentiation and expansion …	NA	68.1951	741.208	97.1823	87.6519	78.1953	75.598	77.5671	81.9545	524.137	82.9078	79.6361	200.51	77.5205	79.9292	833.102	110.204	66.6746	146.792	76.1994	85.4907	131.825	125.501	111.195	385.569	73.0593	122.887	381.233	70.2445	121.196	119.068	79.8388	360.645	129.043	70.9918	281.894	160.97	67.4296	81.5057	791.631	75.3142	164.179	103.59	516.89	133.088	87.6714	96.8283
AT2G42140_at	AT2G42140	VQ motif-containing protein; FUNCTIONS IN: molecular_function unknown; INVOLVED IN: biological_process unknown; LOCATED IN: cellular_component unknown; EXPRESSED IN: flower; EXPRESSED DURING: 4 anthesis, petal differentiation and expansion stage; CONTAINS InterPro DOMAIN/s: VQ (InterPro:IPR008889); BEST Arabidopsis thaliana protein match is: VQ motif-containing protein (TAIR:AT3G58000.1); Has 34 …	NA	29.0537	199.826	54.3851	37.1297	27.5706	32.4054	29.3791	32.1897	87.5871	36.3715	32.118	147.596	28.9711	33.7235	95.3108	42.7178	32.5559	22.8804	33.0419	37.5597	22.0407	37.5611	58.1346	75.369	46.5212	79.3161	56.8987	31.3877	75.2791	90.837	42.4419	101.713	76.5515	22.7345	74.2487	50.9395	36.2119	33.458	93.0839	41.6817	82.0764	74.4458	146.38	59.6997	75.3788	66.5954
AT3G07140_at	AT3G07140	GPI transamidase component Gpi16 subunit family protein; FUNCTIONS IN: GPI-anchor transamidase activity; INVOLVED IN: biological_process unknown; LOCATED IN: endoplasmic reticulum; EXPRESSED IN: 24 plant structures; EXPRESSED DURING: 13 growth stages; CONTAINS InterPro DOMAIN/s: Gpi16 subunit, GPI transamidase component (InterPro:IPR007245); Has 252 Blast hits to 238 proteins in 104 species: Arch…	NA	697.936	288.43	693.16	571.768	602.214	493.499	632.454	507.503	103.979	623.149	514.571	841.12	559.664	506.195	217.436	535.066	622.033	434.168	469.057	446.179	475.393	530.166	214.89	740.8	662.074	205.484	806.357	729.114	202.302	581.751	530.132	569.514	512.099	752.301	821.229	513.792	603.295	433.124	631.566	539.199	697.981	532.774	348.241	471.428	494.943	488.127
AT3G09160_at	AT3G09160	RNA recognition motif (RRM)-containing protein; FUNCTIONS IN: nucleotide binding, nucleic acid binding; INVOLVED IN: biological_process unknown; LOCATED IN: cellular_component unknown; EXPRESSED IN: 10 plant structures; EXPRESSED DURING: 4 anthesis, petal differentiation and expansion stage; CONTAINS InterPro DOMAIN/s: RNA recognition motif, RNP-1 (InterPro:IPR000504), Nucleotide-binding, alpha-b…	NA	45.1701	57.1648	28.2989	42.4255	37.9428	52.6327	31.3365	34.1294	77.1687	64.9933	25.2	96.8084	34.3906	25.3729	62.7646	34.6159	50.6815	47.8421	60.0744	23.7705	40.0418	37.5087	34.1601	97.3044	29.1781	29.2912	83.8292	37.5678	37.9654	41.5672	106.056	97.7026	57.2262	27.9078	68.0577	41.0651	26.2914	60.5202	218.21	48.4802	229.35	34.39	30.0997	30.4051	36.8495	33.071
AT3G09380_at	AT3G09380	FUNCTIONS IN: molecular_function unknown; INVOLVED IN: biological_process unknown; LOCATED IN: cellular_component unknown; EXPRESSED IN: sperm cell, flower; EXPRESSED DURING: petal differentiation and expansion stage; CONTAINS InterPro DOMAIN/s: Protein of unknown function DUF59 (InterPro:IPR002744); BEST Arabidopsis thaliana protein match is: vacuolar sorting signal binding (TAIR:AT1G68310.2); H…	NA	29.2464	97.3195	49.8684	29.2248	37.5305	22.379	25.9118	38.0318	157.385	28.6586	34.5419	74.4778	31.2594	31.6156	54.8137	46.0164	33.5386	115.377	33.5155	26.3563	101.458	31.2974	30.692	104.323	36.2536	35.4241	126.861	27.0083	45.4166	45.6985	31.8856	319.267	38.8985	28.9732	104.17	33.3064	29.7582	28.6708	200.319	34.0375	118.528	28.5752	36.2069	68.068	26.0509	59.014
AT3G10580_at	AT3G10580	myb family transcription factor; FUNCTIONS IN: transcription factor activity, DNA binding; INVOLVED IN: regulation of transcription, DNA-dependent; EXPRESSED IN: leaf whorl, sepal, flower, leaf; EXPRESSED DURING: LP.04 four leaves visible, petal differentiation and expansion stage; CONTAINS InterPro DOMAIN/s: SANT, DNA-binding (InterPro:IPR001005), Homeodomain-like (InterPro:IPR009057), Myb, DNA-…	NA	86.5633	237.297	132.065	93.9625	86.8003	74.7494	82.7136	77.2364	120.377	87.6351	73.3695	214.294	91.6834	92.6922	213.358	92.1668	71.87	68.1848	98.193	94.2035	62.2875	94.1693	118.588	149.511	79.9098	139.462	185.744	67.6911	134.111	118.617	99.9697	225.391	87.1084	58.3913	176.07	73.6665	62.7041	105.75	106.284	83.2556	196.938	96.4461	86.1932	171.23	91.1918	127.858
AT3G12860_at	AT3G12860	nucleolar protein Nop56, putative; INVOLVED IN: biological_process unknown; EXPRESSED IN: 17 plant structures; EXPRESSED DURING: 8 growth stages; CONTAINS InterPro DOMAIN/s: Pre-mRNA processing ribonucleoprotein, binding region (InterPro:IPR002687), NOP5, N-terminal (InterPro:IPR012974), NOSIC (InterPro:IPR012976); BEST Arabidopsis thaliana protein match is: NOP56 (Arabidopsis homolog of nucleola…	NA	526.795	442.659	910.856	216.157	444.836	377.05	301.748	491.8	223.015	259.53	448.549	732.345	366.702	556.524	380.426	288.999	772.704	730.122	227.764	568.181	611.744	268.614	691.684	776.604	1324.03	792.404	690.686	631.105	857.167	796.445	564.32	622.276	655.696	895.72	694.644	606.157	671.308	350.056	1369.33	388.331	1426.45	823.057	325.327	555.837	718.971	1075.44
AT3G14450_at	AT3G14450	RNA-binding protein, putative, contains Pfam profile: PF00076 RNA recognition motif. (a.k.a. RRM, RBD, or RNP domain) (2 copies). Contains PAM PABC binding domain.	CTC-INTERACTING DOMAIN 9 (CID9)	275.081	690.649	310.104	309.948	243.333	199.437	235.646	353.783	331.143	383.779	359.717	694.036	303.88	301.353	535.456	296.244	316.614	227.817	298.376	309.502	345.497	292.447	317.874	681.56	400.935	339.243	724.158	281.104	308.779	301.156	415.14	627.443	423.486	384.275	591.406	385.534	216.909	298.701	244.638	258.399	280.995	314.617	682.578	376.521	267.853	336.346
AT3G15440_at	AT3G15440	FUNCTIONS IN: molecular_function unknown; INVOLVED IN: biological_process unknown; LOCATED IN: cellular_component unknown; BEST Arabidopsis thaliana protein match is: zinc finger (C3HC4-type RING finger) family protein (TAIR:AT3G15740.1); Has 6 Blast hits to 6 proteins in 1 species: Archae - 0; Bacteria - 0; Metazoa - 0; Fungi - 0; Plants - 6; Viruses - 0; Other Eukaryotes - 0 (source: NCBI BLink…	NA	7.5877	42.0012	10.0405	9.76591	11.231	27.9996	11.1204	4.87406	32.7206	8.32673	7.49541	60.7818	9.13306	6.89916	58.6573	16.5023	10.3748	44.5352	12.7739	13.1476	63.7402	9.19606	13.6631	29.0342	17.5433	29.4457	27.7928	9.91401	13.2011	18.0519	6.57024	18.4388	28.8344	8.99012	20.0961	14.7139	14.5894	9.45358	80.4211	11.8671	57.4614	22.2358	21.8096	9.93285	20.5068	10.3602
AT3G16840_at	AT3G16840	ATP binding / ATP-dependent helicase/ helicase/ nucleic acid binding; FUNCTIONS IN: helicase activity, nucleic acid binding, ATP binding, ATP-dependent helicase activity; INVOLVED IN: biological_process unknown; LOCATED IN: cellular_component unknown; EXPRESSED IN: 22 plant structures; EXPRESSED DURING: 13 growth stages; CONTAINS InterPro DOMAIN/s: DNA/RNA helicase, DEAD/DEAH box type, N-terminal…	NA	805.354	367.231	767.179	532.769	555.72	1270.71	649.144	609.432	342.072	489.275	517.642	549.04	705.85	520.068	521.694	843.451	1168.64	775.607	616.36	498.491	845.544	534.312	566.157	1485.08	1250.08	609.001	843.711	846.197	605.599	865.377	781.495	909.338	985.066	1007.67	835.234	890.341	705.933	714.317	1049.35	734.402	773.858	1077.1	408.172	634.52	979.622	816.662
AT3G45320_at	AT3G45320	unknown protein; FUNCTIONS IN: molecular_function unknown; INVOLVED IN: biological_process unknown; LOCATED IN: cellular_component unknown; EXPRESSED IN: leaf whorl, petal, sepal, flower; EXPRESSED DURING: 4 anthesis, petal differentiation and expansion stage; BEST Arabidopsis thaliana protein match is: unknown protein (TAIR:AT5G60330.1); Has 3 Blast hits to 3 proteins in 1 species: Archae - 0; B…	NA	33.6988	297.65	31.889	29.4498	27.2569	24.4201	22.3712	24.1992	86.2633	28.1169	40.1447	62.2347	30.1413	87.2616	270.917	23.0236	20.9572	32.4748	26.6848	129.403	29.1247	22.6171	181.298	207.881	24.5069	252.675	163.459	26.4561	246.352	27.4573	24.9773	165.175	75.2523	27.5247	145.8	54.969	29.4479	22.2791	61.1454	26.323	75.0888	31.9547	110.122	38.8738	27.5439	25.6005
AT3G57157_at	AT3G57157	other RNA	NA	133.741	399.703	129.145	121.632	100.221	58.0522	103.165	97.0814	124.872	522.859	83.6738	151.664	122.237	80.1003	159.844	57.4731	151.167	61.9282	67.086	87.0734	56.707	60.2148	78.8331	394.517	62.0623	100.335	315.547	125.165	100.763	67.845	240.056	208.484	147.127	63.957	247.655	181.066	174.297	180.153	97.6323	76.0174	160.922	62.7087	225.524	146.248	54.9467	147.65
AT4G10260_at	AT4G10260	pfkB-type carbohydrate kinase family protein; FUNCTIONS IN: kinase activity, ribokinase activity; INVOLVED IN: D-ribose metabolic process, acetate fermentation, sucrose biosynthetic process, sucrose catabolic process, using beta-fructofuranosidase; LOCATED IN: cellular_component unknown; EXPRESSED IN: leaf whorl, petal, sepal, male gametophyte, flower; EXPRESSED DURING: 4 anthesis, petal differen…	NA	114.959	1029.03	187.093	102.607	114.59	54.7615	102.427	93.7072	140.597	130.441	110.978	246.393	101.802	137.867	1171.64	86.6681	103.261	92.742	86.2735	128.071	90.5373	101.847	135.211	560.796	116.288	193.343	488.623	102.123	165.224	96.4767	96.8444	554.467	396.811	102.407	417.066	561.092	94.0155	127.1	282.384	135.898	275.442	117.244	1170.35	190.12	105.52	185.391
AT4G13260_at	AT4G13260	YUCCA2 (YUC2); FUNCTIONS IN: NADP or NADPH binding, oxidoreductase activity, FAD binding, flavin-containing monooxygenase activity; INVOLVED IN: auxin biosynthetic process; EXPRESSED IN: 24 plant structures; EXPRESSED DURING: 13 growth stages; CONTAINS InterPro DOMAIN/s: Flavin-containing monooxygenase FMO (InterPro:IPR000960), Pyridine nucleotide-disulphide oxidoreductase, class-II (InterPro:IPR…	YUCCA2 (YUC2)	194.499	357.164	201.61	169.723	163.564	207.498	181.054	149.511	458.735	222.735	147.59	352.443	198.272	180.977	426.458	139.865	166.212	115.41	165.821	166.019	143.946	163.966	155.703	825.682	129.831	170.513	831.138	150.161	172.7	141.371	200.578	556.22	142.788	135.092	725.368	155.59	152.791	149.97	322.004	145.157	342.528	146.276	195.976	263.302	132.855	232.373
AT4G20100_at	AT4G20100	PQ-loop repeat family protein / transmembrane family protein; FUNCTIONS IN: molecular_function unknown; INVOLVED IN: biological_process unknown; LOCATED IN: membrane; EXPRESSED IN: 15 plant structures; EXPRESSED DURING: F mature embryo stage, petal differentiation and expansion stage, D bilateral stage, E expanded cotyledon stage; CONTAINS InterPro DOMAIN/s: Cystinosin/ERS1p repeat (InterPro:IPR0…	NA	36.3648	80.4385	35.8962	38.0048	34.4401	41.5324	34.7169	29.7334	102.012	38.2817	30.0241	94.0111	39.1804	40.9266	87.9927	30.3508	33.369	37.3525	29.6302	34.7907	40.7049	30.7469	38.5767	174.706	34.3105	51.8584	177.023	32.5818	62.8856	35.709	33.1805	144.675	32.1154	38.0895	143.278	27.9532	28.3219	29.1192	152.861	32.6061	101.82	43.8489	35.7432	57.0174	45.4316	40.137
AT4G24950_at	AT4G24950	unknown protein; FUNCTIONS IN: molecular_function unknown; INVOLVED IN: biological_process unknown; LOCATED IN: cellular_component unknown; Has 2 Blast hits to 2 proteins in 1 species: Archae - 0; Bacteria - 0; Metazoa - 0; Fungi - 0; Plants - 2; Viruses - 0; Other Eukaryotes - 0 (source: NCBI BLink).	NA	110.386	165.734	127.409	86.7165	74.4911	63.5778	75.0788	70.1596	146.539	91.7937	68.8803	242.007	77.5337	66.4538	162.723	72.5955	78.9865	54.9061	78.2207	69.746	93.5731	62.3591	61.1141	570.61	68.1768	70.1267	467.996	89.0926	65.0581	63.558	74.9508	348.137	67.1822	70.3159	379.747	70.8489	77.8761	86.2425	300.508	75.0173	255.52	87.3154	92.5457	155.681	74.0918	117.876
AT4G26440_at	AT4G26440	member of WRKY Transcription Factor; Group I	WRKY DNA-BINDING PROTEIN 34 (WRKY34)	34.5683	260.118	38.3382	31.9391	27.5673	29.0935	30.2948	28.889	136.651	31.4119	28.4078	241.451	30.5743	32.8944	361.203	34.8883	31.9147	26.8815	30.9159	35.6849	30.0654	26.5045	42.6753	123.138	34.9621	40.1553	114.745	27.1613	41.7733	32.3056	33.0019	148.994	47.386	27.8862	110.156	47.5193	28.1824	29.2967	167.857	34.6917	146.529	39.1859	129.912	49.331	40.1299	47.9265
AT4G38390_at	AT4G38390	unknown protein; FUNCTIONS IN: molecular_function unknown; INVOLVED IN: biological_process unknown; LOCATED IN: cellular_component unknown; EXPRESSED IN: flower, pollen tube; EXPRESSED DURING: 4 anthesis; CONTAINS InterPro DOMAIN/s: Protein of unknown function DUF246, plant (InterPro:IPR004348); BEST Arabidopsis thaliana protein match is: unknown protein (TAIR:AT1G76270.1); Has 433 Blast hits to …	ROOT HAIR SPECIFIC 17 (RHS17)	61.1667	338.026	102.065	73.9428	62.6128	50.2463	53.4533	66.6451	164.143	69.7235	72.7773	121.616	66.2262	72.3839	348.599	69.2597	58.9989	80.3294	76.6868	75.5073	82.65	81.7983	112.777	271.381	70.5626	131.702	262.5	65.0334	143.969	92.9664	55.4631	318.871	75.6209	68.3004	287.872	101.027	84.8902	68.0792	201.428	68.5938	516.506	52.1528	270.889	120.186	46.9722	160.368
AT5G13130_at	AT5G13130	ATP binding; FUNCTIONS IN: ATP binding; INVOLVED IN: biological_process unknown; LOCATED IN: cellular_component unknown; CONTAINS InterPro DOMAIN/s: ATP-binding region, ATPase-like (InterPro:IPR003594); BEST Arabidopsis thaliana protein match is: ATP-binding region, ATPase-like domain-containing protein (TAIR:AT4G24970.1); Has 1196 Blast hits to 1057 proteins in 191 species: Archae - 5; Bacteria …	NA	20.6062	105.993	35.2658	21.966	23.496	47.3974	14.0131	24.97	135.451	24.7264	23.3561	114.16	19.3322	32.6506	127.825	25.1655	22.8927	17.0367	22.6117	35.5997	15.1102	22.2492	50.2384	73.2369	32.4006	52.5082	78.2904	23.5273	57.28	29.1135	34.369	104.307	32.2485	18.2878	63.8351	29.1144	20.8474	24.3295	67.201	26.0512	155.229	61.317	31.0219	45.6334	47.2347	29.8487
AT5G18070_at	AT5G18070	encodes a novel protein involved in DNA repair from UV damage. Isolated by functional complementation of E. coli UV-sensitive mutants (UVR genes).	DNA-DAMAGE-REPAIR/TOLERATION 101 (DRT101)	266.495	121.008	452.576	168.225	294.071	338.689	224.597	284.727	88.112	184.519	303.875	668.043	234.358	298.921	294.79	208.735	247.547	313.309	178.807	265.159	329.577	171.663	162.58	724.489	313.361	145.373	631.346	242.494	140.317	277.59	221.119	537.683	248.749	259.182	390.675	243.415	272.518	155.852	897.28	215.938	544.69	643.601	292.873	367.763	514.298	331.009
AT5G39840_at	AT5G39840	ATP-dependent RNA helicase, mitochondrial, putative; FUNCTIONS IN: helicase activity, ATP-dependent RNA helicase activity, nucleic acid binding, ATP binding; INVOLVED IN: biological_process unknown; LOCATED IN: mitochondrion; EXPRESSED IN: 14 plant structures; EXPRESSED DURING: 7 growth stages; CONTAINS InterPro DOMAIN/s: DEAD-like helicase, N-terminal (InterPro:IPR014001), DNA/RNA helicase, C-te…	NA	114.949	104.694	118.994	52.6996	67.6912	159.314	74.6131	75.0157	94.3445	50.4565	63.2652	142.83	74.4257	54.0876	105.729	81.9975	175.629	131.303	56.2932	47.1822	147.474	55.9625	48.4007	260.076	178.608	43.5676	256.434	98.3901	54.1499	130.808	86.4848	174.647	105.21	187.969	170.953	104.971	103.752	84.0774	187.049	91.8308	178.539	304.228	68.0588	87.6289	242.005	126.339
AT5G40040_at	AT5G40040	60S acidic ribosomal protein P2 (RPP2E); FUNCTIONS IN: structural constituent of ribosome; INVOLVED IN: translational elongation; LOCATED IN: cytosolic ribosome, ribosome; EXPRESSED IN: 7 plant structures; EXPRESSED DURING: 4 anthesis, F mature embryo stage, petal differentiation and expansion stage, D bilateral stage; CONTAINS InterPro DOMAIN/s: Ribosomal protein 60S (InterPro:IPR001813); BEST A…	NA	401.047	862.349	459.438	260.696	324.288	173.715	323.066	248.547	489.131	294.786	275.135	1095.94	277.757	271.955	889.483	196.522	290.246	440.507	236.209	252.106	665.411	265.828	286.474	1276.64	320.538	358.103	1294.22	316.21	348.124	347.734	307.2	1057.37	495.865	399.644	849.309	578.72	292.006	288.724	931.503	217.311	962.272	288.075	1405.4	471.83	344.117	479.443
AT5G44980_at	AT5G44980	F-box family protein; LOCATED IN: cellular_component unknown; EXPRESSED IN: 14 plant structures; EXPRESSED DURING: 8 growth stages; CONTAINS InterPro DOMAIN/s: Cyclin-like F-box (InterPro:IPR001810), FBD (InterPro:IPR013596), FBD-like (InterPro:IPR006566), Leucine-rich repeat 2 (InterPro:IPR013101); BEST Arabidopsis thaliana protein match is: F-box family protein (TAIR:AT5G44960.1); Has 1271 Blas…	NA	31.4749	50.7104	26.7189	69.2419	27.9383	40.3876	33.6842	41.465	64.497	51.0358	35.85	115.018	32.3835	38.136	51.5247	128.421	27.8656	22.9766	61.2564	37.4671	22.6409	41.4489	45.1505	112.596	22.1978	37.2038	114.079	40.6847	48.0995	51.2498	30.3213	86.7627	61.7236	21.8381	102.981	26.0161	30.3878	33.7101	125.053	20.7356	132.26	24.6418	40.2498	33.0451	23.301	19.9341
AT5G46795_at	AT5G46795	microspore-specific promoter 2 (MSP2); FUNCTIONS IN: molecular_function unknown; INVOLVED IN: pollen development; LOCATED IN: chloroplast; EXPRESSED IN: leaf whorl, petal, flower; EXPRESSED DURING: J bicellular pollen stage, 4 anthesis, F microspore release stage, petal differentiation and expansion stage; Has 75 Blast hits to 48 proteins in 14 species: Archae - 0; Bacteria - 0; Metazoa - 56; Fun…	MICROSPORE-SPECIFIC PROMOTER 2 (MSP2)	72.5747	446.82	74.3673	56.9735	56.686	50.5385	49.2263	60.9251	119.779	65.518	57.2232	125.033	60.877	62.4749	398.311	54.2254	52.7581	44.8036	60.2201	63.2458	38.6296	47.3502	75.0518	307.546	56.2707	79.253	253.559	54.4034	85.3835	45.1593	66.121	298.121	104.963	48.2338	296.408	205.215	50.219	63.642	92.6135	59.3311	145.31	60.8501	534.53	97.2252	50.3735	92.9517
AT5G51510_at	AT5G51510	unknown protein; FUNCTIONS IN: molecular_function unknown; INVOLVED IN: biological_process unknown; LOCATED IN: cellular_component unknown; EXPRESSED IN: 22 plant structures; EXPRESSED DURING: 13 growth stages; Has 19 Blast hits to 19 proteins in 8 species: Archae - 0; Bacteria - 0; Metazoa - 0; Fungi - 0; Plants - 17; Viruses - 0; Other Eukaryotes - 2 (source: NCBI BLink).	NA	479.943	266.282	901.865	567.295	595.445	438.656	512.322	514.473	169.419	427.694	522.859	308.521	498.646	627.605	263.96	550.492	303.136	955.563	538.002	657.156	797.174	520.351	603.84	1256.04	613.109	546.23	586.817	663.24	533.983	609.751	403.276	634.309	511.438	710.867	805.006	556.84	841.496	463.017	730.469	607.666	894.69	490.556	457.095	712.141	552.814	773.528
AT5G59240_at	AT5G59240	40S ribosomal protein S8 (RPS8B); FUNCTIONS IN: structural constituent of ribosome; INVOLVED IN: translation, ribosome biogenesis; LOCATED IN: cytosolic small ribosomal subunit, cytosolic ribosome, ribosome, membrane; EXPRESSED IN: 10 plant structures; EXPRESSED DURING: 4 anthesis, F mature embryo stage, petal differentiation and expansion stage, D bilateral stage, E expanded cotyledon stage; CON…	NA	189.131	233.559	477.659	112.987	121.271	211.759	183.823	75.6122	271.935	132.539	62.2903	389.258	156.544	68.0201	615.482	82.5601	139.149	170.457	80.8427	58.1159	248.556	113.771	48.3087	352.943	159.479	67.2689	661.489	185.164	61.9054	152.248	124.52	407.816	178.744	173.749	390.66	141.023	406.574	96.6917	1521.35	94.0613	415.552	321.58	186.156	259.512	482.164	422.49
AT5G61940_at	AT5G61940	ubiquitin carboxyl-terminal hydrolase-related; FUNCTIONS IN: ubiquitin thiolesterase activity, zinc ion binding; INVOLVED IN: ubiquitin-dependent protein catabolic process; LOCATED IN: intracellular; EXPRESSED IN: 7 plant structures; EXPRESSED DURING: 4 anthesis, petal differentiation and expansion stage, D bilateral stage, E expanded cotyledon stage; CONTAINS InterPro DOMAIN/s: Protein of unknow…	NA	45.4391	142.195	40.6677	47.194	38.863	44.0557	39.501	29.6312	141.586	37.7327	25.2093	190.244	41.7822	28.2462	154.692	52.1089	54.1115	50.6151	40.2498	30.8537	43.5018	33.0025	35.7214	111.373	61.0179	35.3638	95.3217	51.5892	36.8883	125.372	50.6877	209.805	106.561	53.2368	240.256	55.833	31.38	49.7967	145.296	44.2705	152.605	83.0968	51.1238	46.3763	66.3773	36.2487
AT5G64560_at	AT5G64560	Transmembrane magnesium transporter. One of 9 family members.	MAGNESIUM TRANSPORTER 9 (MGT9)	460.572	459.536	210.279	432.822	458.602	242.478	482.146	534.456	81.6839	417.134	585.028	486.938	400.989	602.33	288.489	556.79	521.807	635.407	504.601	640.627	552.706	449.949	457.037	454.441	565.52	454.907	392.194	503.861	444.609	540.546	509.089	448.292	658.06	528.954	783.687	542.896	261.509	507.628	299.39	749.624	295.492	333.755	690.492	315.039	317.397	278.642
AT1G06450_at	AT1G06450	CCR4-NOT transcription complex protein, putative; FUNCTIONS IN: ribonuclease activity, nucleic acid binding; INVOLVED IN: RNA modification; LOCATED IN: nucleus; EXPRESSED IN: 24 plant structures; EXPRESSED DURING: 14 growth stages; CONTAINS InterPro DOMAIN/s: Ribonuclease CAF1 (InterPro:IPR006941), Polynucleotidyl transferase, Ribonuclease H fold (InterPro:IPR012337); BEST Arabidopsis thaliana pr…	NA	135.109	589.554	177.887	85.4656	259.825	138.707	102.334	194.291	242.725	87.0268	183.776	392.258	97.4047	243.505	533.857	98.2021	123.861	344.908	96.813	201.597	429.64	137.729	199.597	223.054	250.202	182.187	293.374	171.067	261.02	334.774	124.849	276.683	336.314	238.883	210.034	287.507	136.006	141.752	155.199	181.992	713.277	343.034	471.462	81.9169	258.617	202.676
AT1G07340_at	AT1G07340	SUGAR TRANSPORTER 2 (ATSTP2); FUNCTIONS IN: carbohydrate transmembrane transporter activity, sugar:hydrogen symporter activity, monosaccharide transmembrane transporter activity; INVOLVED IN: pollen development, monosaccharide transport; LOCATED IN: integral to plasma membrane, membrane; EXPRESSED IN: leaf whorl, petal, sepal, flower, tetrad of microspores; EXPRESSED DURING: 4 anthesis, F microsp…	SUGAR TRANSPORTER 2 (ATSTP2)	63.0182	1234.67	66.7713	51.351	49.7835	54.6958	56.4375	41.8322	220.372	62.8995	52.9447	120.032	59.5558	50.5907	1457.47	52.7252	57.7939	52.6195	53.3341	45.396	86.7109	43.0044	41.381	333.034	46.5908	52.5315	361.606	49.934	46.2391	229.043	50.1952	262.844	643.995	53.0153	223.328	150.951	46.5412	64.3422	97.3431	59.59	135.144	44.9976	216.896	85.0537	44.9468	64.6297
AT1G17710_at	AT1G17710	phosphatase; FUNCTIONS IN: phosphatase activity; EXPRESSED IN: 9 plant structures; EXPRESSED DURING: L mature pollen stage, M germinated pollen stage, 4 anthesis, petal differentiation and expansion stage; CONTAINS InterPro DOMAIN/s: Pyridoxal phosphate phosphatase-related (InterPro:IPR006384); BEST Arabidopsis thaliana protein match is: phosphatase (TAIR:AT1G73010.1); Has 252 Blast hits to 250 p…	NA	132.217	922.587	203	117.252	151.988	170.051	89.4734	136.236	1088.34	205.166	106.846	518.511	105.39	100.373	847.679	104.109	110.824	140.205	97.3566	248.593	92.4984	104.474	513.318	531.37	91.5677	301.233	867.135	152.605	338.194	120.871	109.641	594.593	213.065	94.4178	549.032	342.253	114.213	202.332	761.668	93.2192	456.964	137.268	824.391	193.199	123.458	184.035
AT1G36150_at	AT1G36150	protease inhibitor/seed storage/lipid transfer protein (LTP) family protein; FUNCTIONS IN: lipid binding; INVOLVED IN: lipid transport; LOCATED IN: anchored to membrane; EXPRESSED IN: leaf whorl, sepal, flower; EXPRESSED DURING: petal differentiation and expansion stage; CONTAINS InterPro DOMAIN/s: Bifunctional inhibitor/plant lipid transfer protein/seed storage (InterPro:IPR016140), Plant lipid …	NA	153.94	536.229	223.747	135.832	125.609	67.7676	133.275	101.736	164.504	152.586	115.643	301.061	133.171	129.831	252.552	137.242	116.26	93.958	120.585	134.991	102.705	132.539	151.729	466.656	99.9659	188.518	457.318	120.879	194.173	184.602	112.517	355.021	372.082	97.7625	397.648	107.657	152.586	119.62	181.866	133.966	404.08	66.8733	142.51	232.288	60.6004	237.371
AT1G48940_at	AT1G48940	plastocyanin-like domain-containing protein; FUNCTIONS IN: electron carrier activity, copper ion binding; LOCATED IN: anchored to membrane; EXPRESSED IN: leaf whorl, sepal, flower; EXPRESSED DURING: petal differentiation and expansion stage; CONTAINS InterPro DOMAIN/s: Plastocyanin-like (InterPro:IPR003245), Cupredoxin (InterPro:IPR008972); BEST Arabidopsis thaliana protein match is: plastocyanin…	NA	95.7092	479.699	133.823	89.2736	67.8331	53.7036	76.4688	81.1617	95.7089	103.374	88.7943	111.199	93.2493	86.1612	425.923	97.4008	93.8831	52.8156	94.991	79.5711	54.328	85.9362	106.606	165.209	79.9157	147.075	148.804	75.2371	156.4	93.5826	97.6348	134.541	330.84	51.7001	196	80.1798	70.468	80.9522	107.266	85.1177	84.0082	41.255	96.7856	148.883	32.2245	120.251
AT1G56360_at	AT1G56360	PURPLE ACID PHOSPHATASE 6 (PAP6); FUNCTIONS IN: protein serine/threonine phosphatase activity, acid phosphatase activity; INVOLVED IN: biological_process unknown; LOCATED IN: endomembrane system; EXPRESSED IN: leaf whorl, petal, sepal, flower; EXPRESSED DURING: 4 anthesis, petal differentiation and expansion stage; CONTAINS InterPro DOMAIN/s: Purple acid phosphatase, N-terminal (InterPro:IPR01591…	PURPLE ACID PHOSPHATASE 6 (PAP6)	46.2708	575.754	46.4901	40.6879	44.3652	33.5992	35.7007	45.7463	120.64	42.032	54.2099	130.19	43.3771	44.2352	534.73	45.6625	44.2229	39.9549	39.6903	44.8367	79.0749	43.5005	51.3761	243.997	67.1947	51.2609	264.576	50.3038	53.5883	143.381	62.4488	297.822	390.899	49.8975	179.68	99.8532	42.2508	48.4264	92.08	68.2257	124.117	68.711	120.538	62.2989	52.7336	49.0982
AT1G74990_at	AT1G74990	zinc finger (C3HC4-type RING finger) family protein; FUNCTIONS IN: protein binding, zinc ion binding; EXPRESSED IN: 16 plant structures; EXPRESSED DURING: 4 anthesis, F mature embryo stage, 4 leaf senescence stage, petal differentiation and expansion stage, E expanded cotyledon stage; CONTAINS InterPro DOMAIN/s: Zinc finger, RING-type, conserved site (InterPro:IPR017907), Zinc finger, RING-type (…	NA	146.387	319.578	194.089	123.343	118.383	80.6372	101.53	93.9682	491.49	129.507	120.694	255.338	116.618	168.195	330.268	137.575	116.885	94.8535	143.199	165.44	82.7933	118.178	192.603	524.199	96.1733	262.331	520.3	97.8248	224.914	86.8902	99.8394	433.862	107.251	102.562	408.123	118.473	108.645	114.98	485.757	120.771	211.281	97.3506	133.771	219.133	87.4272	227.38
AT2G20970_at	AT2G20970	unknown protein; FUNCTIONS IN: molecular_function unknown; INVOLVED IN: biological_process unknown; LOCATED IN: cellular_component unknown; EXPRESSED IN: leaf whorl, sepal; EXPRESSED DURING: petal differentiation and expansion stage.	NA	53.4879	173.196	49.9741	49.1987	43.9471	39.1981	49.0646	40.2887	135.749	51.18	34.7077	184.125	50.3738	51.3384	203.165	28.314	38.1395	25.9761	40.1109	53.5466	24.2584	39.2694	86.9614	80.6273	53.1377	100.553	52.0338	40.7106	106.891	60.0329	58.592	77.3898	86.3422	35.3177	40.1216	40.943	40.1055	46.1612	105.382	48.4785	93.7006	76.1639	46.7332	56.1864	92.8366	39.6237
AT2G22030_at	AT2G22030	kelch repeat-containing F-box family protein; FUNCTIONS IN: molecular_function unknown; INVOLVED IN: biological_process unknown; EXPRESSED IN: leaf whorl, sepal; EXPRESSED DURING: petal differentiation and expansion stage; CONTAINS InterPro DOMAIN/s: Cyclin-like F-box (InterPro:IPR001810), Galactose oxidase/kelch, beta-propeller (InterPro:IPR011043), Kelch repeat type 1 (InterPro:IPR006652), Kelc…	NA	76.9395	174.854	62.7667	54.4751	42.4446	73.6571	59.1033	44.9366	350.255	62.1386	41.2707	267.605	57.0421	45.4654	277.97	51.727	49.0905	54.9519	55.1629	51.96	67.2539	48.736	63.4116	267.755	44.1987	74.098	306.344	49.6367	76.8369	77.3805	58.014	246.443	90.6018	46.7438	215.881	42.4854	47.7745	50.3138	162.637	53.413	162.115	72.9186	47.1925	70.0749	68.6605	56.8048
AT2G28680_at	AT2G28680	cupin family protein; FUNCTIONS IN: nutrient reservoir activity; INVOLVED IN: biological_process unknown; LOCATED IN: cellular_component unknown; EXPRESSED IN: leaf whorl, petal, sepal, male gametophyte, flower; EXPRESSED DURING: 4 anthesis, petal differentiation and expansion stage; CONTAINS InterPro DOMAIN/s: Cupin, RmlC-type (InterPro:IPR011051), Cupin 1 (InterPro:IPR006045), RmlC-like jelly r…	NA	122.61	1204.85	137.549	102.847	205.629	61.0298	94.9448	100.839	199.465	112.513	97.2886	1594.26	105.172	96.5838	1345.39	93.9596	103.988	507.466	107.443	96.9157	504.306	93.0481	102.688	565.157	78.3119	105.784	482.416	97.7566	119.821	226.04	91.7937	367.634	683.919	93.2883	386.895	210.809	93.0407	102.583	2541.32	96.8022	3264.34	81.8295	355.988	206.618	58.2837	116.185
AT2G39590_at	AT2G39590	40S ribosomal protein S15A (RPS15aC); FUNCTIONS IN: structural constituent of ribosome; INVOLVED IN: translation; LOCATED IN: cytosolic small ribosomal subunit; EXPRESSED IN: leaf whorl, sepal, flower; EXPRESSED DURING: petal differentiation and expansion stage; CONTAINS InterPro DOMAIN/s: Ribosomal protein S8 (InterPro:IPR000630); BEST Arabidopsis thaliana protein match is: 40S ribosomal protein…	NA	26.4302	61.1049	32.2318	19.8892	25.9433	12.8695	18.8364	28.1994	113.872	21.3535	27.8024	97.3929	22.4868	25.9126	130.826	25.6084	22.3691	23.3406	17.7933	26.1442	44.0677	17.8743	15.9256	200.419	20.7397	24.4355	119.183	24.0551	20.5167	89.3026	19.5227	104.963	113.284	23.6158	107.766	22.3858	24.46	18.9026	40.5864	20.8585	40.0845	25.103	26.312	26.8142	24.0292	25.6923
AT2G42480_at	AT2G42480	meprin and TRAF homology domain-containing protein / MATH domain-containing protein; FUNCTIONS IN: molecular_function unknown; INVOLVED IN: biological_process unknown; LOCATED IN: cellular_component unknown; EXPRESSED IN: leaf whorl, sepal, flower; EXPRESSED DURING: petal differentiation and expansion stage; CONTAINS InterPro DOMAIN/s: TRAF-like (InterPro:IPR008974), MATH (InterPro:IPR002083); BE…	NA	95.2295	207.514	91.0772	90.8587	75.0363	66.7018	84.0948	63.1427	214.671	95.3335	64.1052	309.177	88.0219	66.721	351.742	85.1583	84.0948	55.3448	78.158	64.8299	56.4154	80.3849	88.3397	366.302	61.435	88.536	313.718	81.9449	86.8983	107.902	61.577	240.015	144.274	73.2202	306.725	83.1932	78.3226	71.5656	184.592	78.0153	185.646	63.2524	119.807	98.4492	55.1046	84.5463
AT2G46880_at	AT2G46880	PURPLE ACID PHOSPHATASE 14 (PAP14); FUNCTIONS IN: protein serine/threonine phosphatase activity, acid phosphatase activity; LOCATED IN: endomembrane system; EXPRESSED IN: leaf whorl, sepal, flower; EXPRESSED DURING: petal differentiation and expansion stage; CONTAINS InterPro DOMAIN/s: Metallophosphoesterase (InterPro:IPR004843), Phosphoesterase At2g46880 (InterPro:IPR011230); BEST Arabidopsis th…	PURPLE ACID PHOSPHATASE 14 (PAP14)	75.0341	209.324	85.193	57.3153	54.3669	97.3608	67.9812	49.696	180.634	86.2768	46.3283	264.233	73.7534	57.9937	267.651	54.7074	54.0243	45.3963	71.596	63.8127	49.8281	52.209	99.2873	219.944	51.5763	122.4	253.635	54.8304	112.453	65.5404	71.971	239.352	93.5476	48.2983	192.226	52.9937	43.1938	62.8925	125.103	59.8814	135.324	83.153	55.7284	111.268	70.7048	102.082
AT3G50570_at	AT3G50570	hydroxyproline-rich glycoprotein family protein; FUNCTIONS IN: molecular_function unknown; INVOLVED IN: biological_process unknown; EXPRESSED IN: 11 plant structures; EXPRESSED DURING: 4 anthesis, LP.04 four leaves visible, 4 leaf senescence stage, LP.02 two leaves visible, petal differentiation and expansion stage; BEST Arabidopsis thaliana protein match is: unknown protein (TAIR:AT1G44224.1); H…	NA	141.051	690.176	86.4368	70.954	96.2572	66.9491	112.77	87.0658	98.9764	93.7438	112.907	380.053	91.2639	94.4096	632.286	50.2434	110.168	42.4112	64.9601	110.968	45.8386	75.9809	130.457	217.086	57.5025	141.837	216.246	100.384	125.193	348.929	105.079	235.473	500.885	59.9284	200.048	251.329	47.5826	100.486	132.739	94.7049	157.722	51.6118	698.389	98.3175	43.4998	79.8199
AT3G50580_at	AT3G50580	unknown protein; LOCATED IN: endomembrane system; EXPRESSED IN: leaf whorl, sepal, flower; EXPRESSED DURING: petal differentiation and expansion stage; BEST Arabidopsis thaliana protein match is: unknown protein (TAIR:AT1G44191.1); Has 116179 Blast hits to 44611 proteins in 1670 species: Archae - 379; Bacteria - 19713; Metazoa - 42232; Fungi - 14182; Plants - 14876; Viruses - 3891; Other Eukaryot…	NA	57.7613	316.337	48.2117	49.4256	44.5066	65.5454	51.8896	42.7184	201.962	58.0815	42.3244	164.712	50.9079	62.1303	455.272	39.2921	42.3864	36.9846	47.1706	72.2287	51.1993	39.8273	68.6049	154.377	37.2607	75.2282	188.067	39.8706	69.8084	393.572	49.6644	183.302	355.048	37.9946	137.388	42.7322	35.9305	47.6563	170.588	43.145	104.269	71.3964	70.5149	58.4314	60.6839	52.6648
AT3G58290_at	AT3G58290	meprin and TRAF homology domain-containing protein / MATH domain-containing protein; FUNCTIONS IN: molecular_function unknown; INVOLVED IN: biological_process unknown; LOCATED IN: endomembrane system; EXPRESSED IN: leaf whorl, sepal, flower; EXPRESSED DURING: petal differentiation and expansion stage; CONTAINS InterPro DOMAIN/s: TRAF-like (InterPro:IPR008974), MATH (InterPro:IPR002083); BEST Arab…	NA	43.2123	271.076	49.4261	48.4503	37.45	53.4563	40.1561	32.2066	127.724	45.0693	34.4332	46.6348	52.2615	34.9269	519.238	43.9212	53.8481	31.3549	40.5852	28.2077	44.5531	37.0771	46.371	186.414	35.863	53.4637	215.773	32.9899	50.6272	117.808	39.645	178.184	150.125	32.3311	175.072	43.2662	38.2383	41.4527	78.485	43.2534	96.9334	46.9504	44.7574	58.5072	45.3031	48.9122
AT4G28580_at	AT4G28580	Transmembrane magnesium transporter. One of nine family members. Functions in pollen development.	MAGNESIUM TRANSPORT 5 (MGT5)	52.6266	204.434	70.0772	48.7294	58.7081	55.1906	57.7571	48.8812	318.34	49.2541	43.0511	204.834	46.1596	52.2751	239.522	78.9632	48.4117	45.3407	50.4285	49.3802	57.1482	47.9625	58.4454	264.436	67.1353	90.7866	299.674	52.0386	79.1181	113.514	49.9829	260.771	158.716	44.5506	194.032	67.0293	50.049	46.1591	211.949	51.5311	167.21	82.5481	98.181	94.6802	70.5456	82.4114
AT4G36350_at	AT4G36350	PURPLE ACID PHOSPHATASE 25 (PAP25); FUNCTIONS IN: protein serine/threonine phosphatase activity, acid phosphatase activity; INVOLVED IN: biological_process unknown; LOCATED IN: cell wall; EXPRESSED IN: leaf whorl, petal, sepal, flower, cultured cell; EXPRESSED DURING: 4 anthesis, petal differentiation and expansion stage; CONTAINS InterPro DOMAIN/s: Purple acid phosphatase, N-terminal (InterPro:I…	PURPLE ACID PHOSPHATASE 25 (PAP25)	47.2051	684.268	70.3864	52.1638	47.3012	70.4156	50.5256	36.1746	248.687	57.6948	41.0286	151.095	52.0038	48.049	921.859	59.5923	36.6217	38.4822	47.7266	43.9729	73.3434	44.6197	60.5259	288.784	50.2449	60.4131	265.919	50.6399	58.1512	167.067	39.6991	210.322	339.114	46.6504	203.645	87.5545	49.2405	44.6012	120.844	49.0641	104.573	96.3835	94.9324	74.7876	97.311	60.3484
AT5G08030_at	AT5G08030	glycerophosphoryl diester phosphodiesterase family protein; FUNCTIONS IN: phosphoric diester hydrolase activity, glycerophosphodiester phosphodiesterase activity; INVOLVED IN: glycerol metabolic process, lipid metabolic process; LOCATED IN: endomembrane system; EXPRESSED IN: leaf whorl, sepal, flower; EXPRESSED DURING: petal differentiation and expansion stage; CONTAINS InterPro DOMAIN/s: PLC-lik…	NA	156.551	406.359	102.746	85.7592	134.68	182.38	78.9327	170.14	209.48	136.72	284.845	159.623	113.305	444.055	529.424	56.7805	103.296	41.7861	80.6457	323.391	56.1675	69.4318	146.749	188.209	72.5231	156.621	153.816	71.8756	163.035	105.442	216.549	154.725	236.209	60.3188	188.577	110.406	55.695	97.7695	137.604	86.4225	147.004	128.2	114.299	115.504	96.4279	109.959
AT5G09500_at	AT5G09500	40S ribosomal protein S15 (RPS15C); FUNCTIONS IN: structural constituent of ribosome; INVOLVED IN: translation; LOCATED IN: cytosolic small ribosomal subunit; EXPRESSED IN: 10 plant structures; EXPRESSED DURING: 4 anthesis, C globular stage, petal differentiation and expansion stage; CONTAINS InterPro DOMAIN/s: Ribosomal protein S15, eukaryotic/archaeal (InterPro:IPR005713), Ribosomal protein S19…	NA	968.089	542.725	1035.7	443.881	816.649	499.462	594.493	693.603	450.955	367.671	591.351	2180.45	685.359	732.841	963.661	262.945	630.838	876.14	261.392	766.563	1103.9	284.226	433.02	1158.42	1081.13	381.984	1067.25	803.885	336.042	857.145	808.71	902.126	993.568	1319.82	1065.08	1108.76	988.65	471.788	2203.13	608.121	2238.86	1259.23	1423.3	834.858	1552.77	1061.73
AT5G17340_at	AT5G17340	unknown protein; FUNCTIONS IN: molecular_function unknown; INVOLVED IN: biological_process unknown; LOCATED IN: endomembrane system; EXPRESSED IN: leaf whorl, petal, sepal, flower; EXPRESSED DURING: 4 anthesis, petal differentiation and expansion stage; BEST Arabidopsis thaliana protein match is: unknown protein (TAIR:AT3G03272.1); Has 57 Blast hits to 57 proteins in 4 species: Archae - 0; Bacter…	NA	45.706	1088.66	42.9066	37.7869	37.0214	39.2111	34.5666	37.124	80.9117	42.0048	51.8543	246.644	41.6743	35.2571	670.089	29.8805	41.2192	34.3938	37.1662	37.6764	91.2781	29.1769	37.2149	212.502	31.6323	42.8609	181.818	30.5421	45.3272	226.216	43.2121	207.285	785.473	32.3039	184.336	126.624	38.6737	41.8422	104.612	34.168	143.072	43.806	103.99	55.8522	41.7043	52.5637
AT5G17580_at	AT5G17580	phototropic-responsive NPH3 family protein; FUNCTIONS IN: protein binding, signal transducer activity; INVOLVED IN: response to light stimulus; LOCATED IN: cellular_component unknown; EXPRESSED IN: stem, sepal; EXPRESSED DURING: petal differentiation and expansion stage; CONTAINS InterPro DOMAIN/s: NPH3 (InterPro:IPR004249), BTB/POZ (InterPro:IPR013069), BTB/POZ fold (InterPro:IPR011333), BTB/POZ…	NA	93.0602	187.154	102.432	84.4038	86.6849	162.306	60.228	84.4499	159.748	87.66	73.1699	248.98	74.2285	92.0106	292.887	101.146	111.331	81.4061	107.163	137.543	83.8849	72.4381	285.372	252.389	71.1839	350.245	228.56	79.1844	295.327	81.3841	85.8546	306.206	114.104	76.8212	662.133	78.2389	58.3026	84.6812	259.325	73.0758	276.507	115.832	86.7697	86.3691	92.2583	90.1423
AT5G28470_at	AT5G28470	transporter; FUNCTIONS IN: transporter activity; INVOLVED IN: oligopeptide transport; LOCATED IN: membrane; EXPRESSED IN: leaf whorl, petal, male gametophyte, sepal, flower; EXPRESSED DURING: L mature pollen stage, M germinated pollen stage, 4 anthesis, petal differentiation and expansion stage; CONTAINS InterPro DOMAIN/s: TGF-beta receptor, type I/II extracellular region (InterPro:IPR000109), Ma…	NA	141.403	929.714	103.079	121.003	108.915	104.615	123.26	94.4414	256.11	149.178	93.2697	149.626	138.14	93.109	955.631	117.796	128.464	85.9157	123.566	84.4245	96.3974	106.805	98.1966	438.233	100.289	116.704	608.134	106.688	124.587	117.228	124.133	401.953	302.255	99.8501	428.834	155.84	96.1249	113.521	136.665	105.871	181.697	71.4829	246.187	118.755	75.0937	101.699
AT5G43340_at	AT5G43340	Encodes Pht1;6, a member of the Pht1 family of phosphate transporters which include: Pht1;1/At5g43350, Pht1;2/At5g43370, Pht1;3/At5g43360, Pht1;4/At2g38940, Pht1;5/At2g32830, Pht1;6/At5g43340, Pht1;7/At3g54700, Pht1;8/At1g20860, Pht1;9/At1g76430 (Plant Journal 2002, 31:341).	PHOSPHATE TRANSPORTER 1;6 (PHT1;6)	64.4109	309.649	93.4593	56.2038	47.2506	73.3087	61.6347	46.7122	219.708	78.149	49.5853	206.302	62.3407	54.176	545.928	56.905	54.1645	63.5764	59.2863	51.6118	74.9765	52.1053	63.9719	491.151	45.2577	76.4102	589.257	51.4552	71.6722	325.567	60.6369	613.373	740.065	50.0994	366.96	118.184	53.5211	52.014	168.669	56.0462	188.453	80.2997	135.344	97.6878	81.4699	85.3322
AT5G53510_at	AT5G53510	oligopeptide transporter	ARABIDOPSIS THALIANA OLIGOPEPTIDE TRANSPORTER 9 (ATOPT9)	150.154	486.208	155.737	95.5132	110.861	52.3485	99.6639	104.091	318.752	138.168	108.141	241.312	103.773	159.835	475.16	82.4686	101.442	80.9306	92.8702	217.399	74.6828	86.9502	212.947	434.281	103.83	262.519	341.686	94.2841	207.882	142.534	125.073	277.645	263.235	79.6251	398.141	98.1144	96.6188	110.212	163.889	106.44	271.654	55.4981	114.375	185.698	52.0737	151.289
AT5G59040_at	AT5G59040	encodes a member of copper transporter family and functionally complements a high affinity copper transporter mutant in yeast	COPPER TRANSPORTER 3 (COPT3)	203.644	518.828	165.811	276.498	141.649	193.382	204.793	117.488	327.01	259.578	140.324	161.958	213.269	110.61	853.579	221.33	149.357	91.1073	227.569	123.717	133.614	185.78	116.192	526.311	91.3739	152.262	519.159	138.091	119.803	154.704	151.913	444.53	307.16	118.679	484.538	236.488	137.157	178.13	242.492	124.464	334.235	132.001	421.867	165.937	107.647	170.623
[truncated: 27 more columns]
